# Supplementary material
Source: Springer Nature journal article supplement (https://www.springermedizin.de/resource/supplementary/12939_2013_438_MOESM2_ESM.pdf/9551172)
Supplement: MOESM2 [file 9551172]

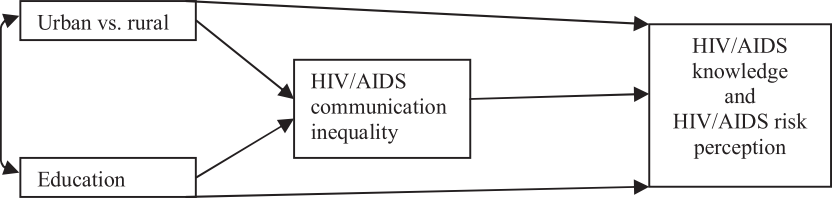

Urban vs. rural

HIV/AIDS  
communication  
inequality

Education

HIV/AIDS  
knowledge  
and  
HIV/AIDS risk  
perception
